1 **Title:** Hydrologic Compartments are More Important than Ecozone in Size-Based  
2 Characterization of Freshwater Dissolved Organic Matter across Canada

3  
4 **Running Head:** DOM Composition across Canadian Ecozones

5  
6 Pieter J. K. Aukes<sup>1\*</sup>, Sherry L. Schiff<sup>1</sup>, Jason J. Venkiteswaran<sup>2</sup>, Richard J. Elgood<sup>1</sup>, John Spoelstra<sup>1,3</sup>

7  
8 1) Department of Earth and Environmental Sciences, University of Waterloo, 200 University Avenue West,  
9 Waterloo, Ontario, N2L 3G1, Canada

10 2) Department of Geography and Environmental Studies, Wilfrid Laurier University, 75 University Avenue West,  
11 Waterloo, Ontario, N2L 3C5, Canada

12 3) Environment and Climate Change Canada, Canada Centre For Inland Waters, 867 Lakeshore Road, Burlington,  
13 Ontario, L7S 1A1, Canada

14  
15 \*corresponding author: [paukes@uwaterloo.ca](mailto:paukes@uwaterloo.ca)

16  
17 **ABSTRACT**

18 Dissolved Organic Matter (DOM) represents a mixture of organic molecules that vary due to different  
19 source materials and degree of processing. Characterizing how DOM composition evolves along the  
20 aquatic continuum can be difficult. Using a size-exclusion chromatography technique (LC-OCD), we  
21 assessed the variability in DOM composition from both surface and groundwaters across a number of  
22 Canadian ecozones (mean annual temperature spanning -10 to +6 C). A range in DOM concentration  
23 was found from 0.2 to 120 mg C/L. Proportions of different size-based groupings across ecozones were  
24 variable, yet similarities between specific hydrologic compartments, regardless of location, suggest  
25 commonality in the processes dictating the evolution of DOM composition. A principal-component  
26 analysis identified 70% of the variation in LC-OCD derived DOM compositions could be explained by  
27 the hydrological compartment. We find that hydrologic compartment has a greater influence on DOM  
28 composition than differences in climate or surrounding vegetation.

29  
30 **Keywords:**

31 Dissolved organic matter, size-exclusion chromatography, DOM composition, hydrologic compartment,  
32 Canadian ecozones

## 33 1 INTRODUCTION

34 Dissolved organic matter (DOM) is a ubiquitous component of terrestrial and aquatic  
35 ecosystems. DOM influences light penetration within lakes (Schindler et al. 1996) and provides an  
36 energy source for microbial metabolism (Biddanda and Cotner 2002). Comprised of thousands of  
37 molecules with differing structures and properties, DOM concentration and composition can vary  
38 greatly among environments due to different physical, chemical, and biological processes. Future  
39 drinking water treatment options may be significantly impacted as climate change is predicted to alter  
40 the quantity and quality of DOM in surface waters (Ritson et al. 2014). Harmful disinfection by-products  
41 (DBP), formed by reactions between DOM and chlorine, are increasingly found in most municipal  
42 drinking water supplies (Krasner et al. 2006). Further, DBP formation is more strongly correlated with  
43 DOM composition than overall DOM concentration (Awad et al. 2016). Increased terrestrial DOM  
44 contributions observed among northern surface waters are thought to result in the ‘brownification’ of  
45 these systems, affecting lake characteristics and food webs (Creed et al. 2018; Wauthy et al. 2018).  
46 Hence, the evolution of DOM composition across the aquatic continuum has important implications for  
47 downstream ecosystems, and must be monitored or observed to better understand its impact on water  
48 treatment effectiveness and downstream ecosystems.

49 Watershed characteristics, such as terrestrial land cover or number of upstream lakes, can  
50 dictate the concentration and composition of DOM that is transported through the aquatic continuum  
51 (Mueller et al. 2012; Jaffé et al. 2012). The persistence of DOM within freshwaters has been linked to its  
52 initial composition (Kellerman et al. 2015). Determination to the variability in DOM composition across  
53 the aquatic continuum can indicate potential avenues of change, allowing us to better anticipate water  
54 treatment requirements and costs related to future DOM changes. However, the inherent complexity  
55 and heterogeneity of DOM makes it difficult to rely on a single method to quantify compositional  
56 differences.

57 Characterizing DOM can involve a number of different techniques, yet many measure either  
58 bulk characteristics or only a subset of all DOM by capturing specific components. A comprehensive

59 chemical characterization of DOM would involve the identification and quantification of thousands of  
60 individual compounds, would be computationally and economically intensive, and may not actually be  
61 possible with current technologies. Fortunately, this level of analysis is not required to make useful  
62 predictions on how DOM will behave in the environment. DOM composition has been assessed via  
63 molecular ratio assays (Hunt et al. 2000), light absorption (Weishaar et al. 2003), fluorescence (Jaffé et al.  
64 2008), resin fractionation (Kent et al. 2014), and mass spectrometry (Kellerman et al. 2014; Hutchins et  
65 al. 2017). Generally, the need for enhanced information on DOM composition and molecular moieties  
66 results in increased cost and complexity to implement (McCallister et al. 2018). Bulk optical indices,  
67 although common due to the relative ease of analysis, only respond to compounds that absorb or  
68 fluoresce in a specific range of wavelengths and can include non-organic components in the matrix  
69 (Weishaar et al. 2003) or miss non-absorbing DOM components (Her et al. 2002). The ideal DOM  
70 characterization method, or combination of methods, would provide sufficient detail on the key aspects  
71 of DOM composition that control its fate and function, yet be analytically simple enough to be cost  
72 effective and practical for environmental applications.

73         Size exclusion chromatography (SEC) has been used to characterize DOM in a variety of  
74 settings including marine systems (Ogawa et al. 2001), lakes (Kent et al. 2014), rivers or streams (He et  
75 al. 2016), and groundwaters (Szabo and Tuhkanen 2010). Liquid Chromatography – Organic Carbon  
76 Detection (LC-OCD) is a simple and quantitative SEC method that separates DOM based upon  
77 hydrodynamic radii and electrostatic properties (Huber et al. 2011). This technique is relatively fast  
78 (<120 minutes per sample) and characterizes both absorbing and non-absorbing DOM components.  
79 Studies using LC-OCD have focussed on wastewater and water treatment applications (Ciputra et al.  
80 2010). Some LC-OCD environmental data exists from agricultural and forested catchments in Germany  
81 (Heinz et al. 2015) and rivers in South Korea (He et al. 2016) and Spain (Catalán et al. 2017). LC-OCD-  
82 based DOM groupings provide a relatively easy measure of DOM size-based composition across a large  
83 suite of environments.

84 Light absorbing and fluorescing components of DOM vary in the environment (Jaffé et al. 2008,  
85 2012) but few studies examine how non-light absorbing DOM components differ across areas with  
86 different climate and vegetation. Here we determine the effectiveness of using size-based groupings of  
87 DOM to quantify differences in DOM composition and, to our knowledge, present one of few studies  
88 that pairs DOM characterization of both groundwater and surface water across a gradient of climate  
89 and vegetation regimes. The objectives of this study are: 1) to determine whether differences in DOM  
90 composition across a gradient of ecozones can be identified by LC-OCD alone, and 2) to quantify the  
91 degree of similarity in DOM composition among hydrological compartments in different ecozones.

92

## 93 **2 METHODS**

### 94 *2.1 Site Descriptions*

95 Samples were collected in the summer months (June to August) across various Canadian  
96 ecozones (Marshall et al. 1999) that span a mean annual temperature from -9.8 to 6.5°C, precipitation  
97 from 313 to 940 mm, and overlie continuous to no permafrost (Figure 1; Suppl. Table 1). Surface water  
98 samples were collected from the Boreal Shield (IISD Experimental Lakes Area (ELA)), Mixedwood  
99 Plains (agriculturally-impacted Grand River (GR)), Taiga Shield (Yellowknife (YW) and Wekweètì  
100 (WK)), and Southern Arctic ecozones (Daring Lake (DL); Suppl. Info Table 1). Groundwater, defined  
101 here as water collected beneath the ground surface, was sampled from various depths from the Boreal  
102 Shield (Turkey Lakes Watershed (TLW)) Mixedwood Plains (Nottawasaga River Watershed (NRW)),  
103 Atlantic Maritime (Black Brook Watershed (BBW)), Taiga Shield (YK, WK), and Southern Arctic (DL).  
104 Both NRW and BBW are areas of extensive agriculture. Shallow subsurface samples were collected from  
105 the Northwest Territories (deepest extent of active-layer in July or August, ~0.1 to 0.5 meters below  
106 surface) and TLW (between 0 to 7 m.b.s), while samples from NRW and BBW were collected at depths  
107 ranging between 1 and 30 m.b.s.

### 108 *2.2 DOM Characterization*

109 All samples were filtered to 0.45 $\mu$ m (Whatman GD/X) into acid-washed and pre-rinsed glass  
110 vials. Samples were immediately stored cool (<4°C) and dark until analyses (within two weeks). DOM  
111 composition was quantitatively assessed using LC-OCD (DOC-Labor, Karlsruhe, Germany; Huber et al.  
112 2011) at the University of Waterloo. The sample is injected through a size-exclusion column (Toyopearl  
113 HW-50S, Tosoh Bioscience) that separates DOM based on hydrodynamic radii into five hydrophilic  
114 fractions (from largest to smallest): biopolymers (BP; polysaccharides or proteins), humic substances  
115 fraction (HSF; humic and fulvic acids), building blocks (BB; lower weight humic substances), low  
116 molecular weight neutrals (LMWN; aldehydes, small organic materials), and LMW-acids (LMWA;  
117 saturated mono-protic acids). A portion of the sample bypasses the column for measurement of total  
118 dissolved organic carbon concentration. The difference between the overall DOM concentration and the  
119 sum of the five eluted fractions is used to quantify a ‘hydrophobic parameter’. As hydrophobics are not  
120 a measured parameter from the LC-OCD, and that the hydrophilic component comprised 90 $\pm$ 9% across  
121 all DOM samples, group percentages were normalized to the sum of the eluted components (total  
122 hydrophilic fraction, herein referred to as DOM<sub>hyphl</sub>). Duplicates run at six concentrations yield a  
123 precision for the LC-OCD of  $\pm$ 0.09 mg C/L or better. Samples also pass through a UV-Detector  
124 (Smartline UV Detector 200, Germany) for determination of the specific ultra-violet absorbance at 254  
125 nm (SUVA), calculated by normalizing the absorbance at this wavelength to the concentration of DOM.

### 126 *2.3 Statistical Analyses*

127 Multiple sampling events from the same site have been averaged into one value per site (Suppl.  
128 Fig S1) and can be viewed in the online data repository (Aukes et al. 2020). Principal component  
129 analyses (PCA) was performed using R (R Core Team 2019).

130

## 131 **3 RESULTS**

### 132 *3.1 DOM Quantity*

133 Highest DOM concentrations were found in groundwater samples in organic-rich peats from  
134 Yellowknife (mean: 97 mg C/L, 1 $\sigma$ :  $\pm$ 40 mg C/L) and ELA (48 $\pm$ 22 mg C /L; Figure 2a, Table 1). Lowest

135 concentrations were found in organic-poor groundwater sites (BBW:  $0.6 \pm 0.4$  mg C/L; NRW:  $2.1 \pm 0.5$  mg  
136 C /L). The agriculturally-impacted river (GR:  $6.1 \pm 1.0$  mg C /L) contained similar DOM concentrations to  
137 Canadian Shield subarctic rivers (YW:  $6.6 \pm 3.1$  mg C /L). Groundwater DOM concentration exhibited  
138 greater difference between ecozones than surface water DOM, and were lower in southern than  
139 northern areas. In general, a larger range in DOM concentration was found across groundwater than  
140 surface water sites.

### 141 *3.2 DOM UV-Absorbance*

142 The UV-absorbing capability of DOM can be compared across samples using SUVA values.  
143 Lowest SUVA values were measured in agriculturally-impacted groundwater DOM and highest in  
144 northern groundwater and boreal stream DOM (Figure 2b; Table 1). Unlike samples from ELA, northern  
145 ecozone groundwaters (DL, WK, and YW) had higher SUVA values than surface water. Highest SUVA  
146 values were encountered in three Boreal Shield lakes at depth (~5-10 m below surface) and may  
147 represent samples with iron interference (Weishaar et al. 2003) and are not included in subsequent  
148 discussion. Overall, SUVA values were generally similar across ecozones and hydrologic compartments.

### 149 *3.3 LC-OCD Characterization*

150 Proportions of BP were similar across ecozones, yet different hydrological compartments within  
151 an ecozone contained different proportions of BP. Biopolymers ranged from 1-45% of  $DOM_{hyphl}$  but  
152 generally contributed less than 15% to  $DOM_{hyphl}$  (Figure 3a; Table 1). Streams and lakes contained  
153 higher BP proportions than groundwaters. Further, groundwater samples from agricultural sites  
154 contained the lowest BP proportions (0.4 and 1.3%, respectively). High BP proportions were found in  
155 Boreal and Arctic lakes, while moderate BP proportions were found in rivers, close to values found in  
156 similar hydrological environments in other studies using LC-OCD (He et al. 2016; Catalán et al. 2017)  
157 (Figure 3). The BP fraction of  $DOM_{hyphl}$  is more similar across hydrological compartments than  
158 comparing different compartments within an ecozone, and high BP proportions are indicative of surface  
159 water DOM.

160 The HSF comprised the largest proportion, representing up to 85% of DOM<sub>hyphl</sub> in some  
161 environments (Figure 3b). Overall, the HSF proportion ranged from 15-85% with the highest proportions  
162 found in Taiga Shield groundwater and Boreal streams (Figure 3). Taiga Shield and Southern Arctic  
163 lakes and ponds contained higher HSF proportions than Boreal lakes (Table 1). Taiga Shield rivers had  
164 slightly lower proportions than an agriculturally-impacted river. Boreal and agriculturally-impacted  
165 groundwaters had the lowest HSF proportions, as well as Boreal wetland groundwater (Table 1; Figure  
166 3).

167 Smaller molecular weight humics, defined as building blocks (BB), ranged from 5 to 37% of  
168 DOM<sub>hyphl</sub>. High BB proportions were found from southern agricultural groundwater samples, while  
169 lowest proportions were observed among groundwater samples in organic rich peats in YW and ELA  
170 (<10%; Figure 3c). Across ecozones, surface waters had comparable proportions of BB between 10-30%  
171 of DOM<sub>hyphl</sub>.

172 Proportions of LMWN ranged from 3-76% and were much lower than HSF except among  
173 groundwater samples (Figure 3d). DOM from Boreal wetland groundwater sites contained higher  
174 LMWN proportions than any other environment (Table 1). Groundwater environments with the lowest  
175 HSF proportion had higher LMWN proportions, specifically the agriculturally-impacted sites. Lowest  
176 proportions were found from Boreal streams and Arctic groundwater and pond samples. LMWA  
177 generally comprised a minor component of total DOM (Figure 3e).

178 The variability across different sites in LC-OCD defined DOM composition was assessed using  
179 PCA. Initially, two principal axes accounted for 60% of the variability within the dataset (Suppl. Fig S2).  
180 However, high LMWN proportions from Boreal wetland groundwaters did not allow for a good  
181 resolution of other components. For this reason, wetland groundwater samples were omitted (n=28) and  
182 the PCA was recalculated based on the remaining samples (n=122; Figure 4). Two principal axes now  
183 account for 71% of the variability and illustrates a similarity in DOM composition when comparing  
184 hydrologic compartments across ecozones. Distinct compositions are observed comparing lake and  
185 groundwater DOM, while rivers and streams contain intermediary compositions between these.

186 Differences in groundwater DOM composition were identified by HSF and LMWN or BB proportions,  
187 while higher BP proportions were common for surface waters. Groundwater DOM from Arctic  
188 ecozones (for organic soils) grouped separately from other groundwater samples (from mineral  
189 substrate), but were similar in composition to Boreal streams. Lakes can be identified by higher BB and  
190 LMWN, lower HS, and occasionally high BP.

191

## 192 **4 DISCUSSION**

### 193 *4.1 Can LC-OCD Analyses Differentiate DOM Composition?*

194 This study provided a comprehensive dataset to examine how size-based groupings of DOM  
195 can be used to quantify DOM heterogeneity across a range of environmental conditions that spans the  
196 Southern Arctic, with long-cold winters and short-cool summers, to the Mixedwood Plains with warm-  
197 wet climates and productive soils. Differences in both the absorbing and non-absorbing DOM fractions  
198 are apparent (Figure 2, 3) and result from differences in organic matter sources, catchment  
199 characteristics, residence times, and processing history (Curtis and Schindler 1997; Jaffé et al. 2008;  
200 Mueller et al. 2012). We find that size-based groupings can identify differences in DOM composition not  
201 observed measuring optical properties alone. For instance, ELA and TLW wetland groundwater samples  
202 contained similar SUVA values (Figure 2b) but different LC-OCD compositions: a greater proportion of  
203 degraded humics at TLW than ELA (Figure 3c; Table 1). The use of various characterization techniques  
204 would provide different information on DOM and may be the best way to holistically quantify DOM.  
205 Differences in size-based groupings of DOM provide additional information suited to identifying  
206 differences in DOM composition that is not provided by UV-based techniques alone.

### 207 *4.2 The Similarity in Groundwater DOM*

208 Groupings of similar hydrologic compartments in the PCA indicates a commonality of DOM  
209 composition across spatial scales. The general conception, especially in groundwater environments, is  
210 that processing of DOM results in a loss of heterogeneity. For instance, leachate degradation resulted in  
211 a convergence towards similar DOM optical properties and degradation kinetics (Harfmann et al. 2019),



212 while physiochemical and biological processes conformed South Carolina soil DOM composition (Shen  
213 et al. 2015). The grouping of groundwater DOM in the PCA supports these observations as various  
214 ecozones contain similar mixtures of LC-OCD defined components. Groundwater DOM is differentiated  
215 from surface water DOM by the proportion of BP, but can be even further separated by HS and LMWN  
216 to compare organic-rich contributions (ELA and TLW) to agriculturally-impacted sites (BBW and NRW;  
217 Figure 3a; Figure 4). Biodegradation and accumulation of DOM in porewaters (Chin et al. 1998) may be  
218 responsible for wetland subsurface DOM from Boreal shield sites being easily identified by high  
219 proportions of LMWN. Hence, size-based groupings of groundwater DOM indicates that, while  
220 composition can differ among groundwater environments, groundwater contains much different DOM  
221 than in surface waters.

#### 222 4.3 Trends in DOM Composition across Hydrological Compartments

223         Photolysis and *in-situ* production are two processes that occur among surface waters that alter  
224 the composition of DOM, and can be identified in changes to size-based groupings of DOM along the  
225 aquatic continuum. Exposure of DOM to sunlight and photochemical transformations of humics results  
226 in smaller molecules and increased proportions of BB (Tercero Espinoza et al. 2009; He et al. 2016). This  
227 is observed in the dataset by a shift in PCA groupings towards higher BB and LMWN among surface  
228 water DOM (Figure 4). High BP in lakes and streams indicate the presence of high molecular weight  
229 polysaccharides or proteins that form during *in-situ* production of autochthonous DOM or microbial  
230 processing of DOM (Ciputra et al. 2010; Huber et al. 2011; Catalán et al. 2017).

231         Rivers and streams can act as conduits of DOM transport and internal producers and processors  
232 of DOM (Creed et al. 2015), producing a DOM composition intermediary between lake and groundwater  
233 end-members. Further, stream DOM composition can identify DOM source as some samples plot closely  
234 with either groundwater or lake DOM (Figure 4). Thus, size-based DOM groupings can be used to  
235 evaluate the importance of autochthonous versus groundwater sources of DOM in rivers and streams.

236         Along a hypothetical flow path, terrestrial subsurface DOM is mobilized into surrounding  
237 ponds and lakes, and eventually exported from the watershed via rivers or streams. Changes to LC-

238 OCD components, concurrent with decreases to overall DOM concentration, are found along this  
239 hypothetical flow with high-HSF from the subsurface being lost as LMW and BP proportions increase  
240 (Figure 3, 4). These changes are in agreement with watershed-scale observations of DOM composition  
241 change along a continuum, shifting from relatively high-molecular weight subsurface components to  
242 smaller, more degraded, and more aliphatic components (Kellerman et al. 2014; Hutchins et al. 2017).  
243 The similarity in DOM composition within hydrological compartments across different ecoregions  
244 (Figure 4) represents how intrinsic properties of DOM may be similarly processed regardless of  
245 surrounding vegetation or climate.

#### 246 *4.4 Implications of Different Size-Based Groupings of DOM*

247 Differences in DOM composition are linked to its hydrologic compartment, hence shifts or  
248 changes to the hydrological regime, such as recent increases to terrestrial-derived DOM, can alter DOM  
249 composition, reactivity, and its effect upon the surrounding environment (Creed et al. 2018). Size-based  
250 groupings of DOM composition can quantify changes that may help identify lakes experiencing  
251 stronger terrestrial influences, such as higher HSF and lower BP. In particular, a shift towards heavier  
252 fall rains in the Northwest Territories, Canada (Spence et al. 2011), can enhance terrestrial DOM  
253 contributions to surrounding surface waters, which may result in increased pre-treatment costs (Ritson  
254 et al. 2014) and higher DBP concentrations (Awad et al. 2016). The ability to characterize and compare  
255 specific DOM compositions is important to better predict, plan, and adapt water treatment methods for  
256 these climate-induced changes.

257

## 258 **5 CONCLUSION**

259 Size exclusion DOM analyses provides a quantitative measure of DOM composition variability  
260 across aquatic environments. In some cases, LC-OCD alone identified differences in DOM among  
261 hydrologic compartments rather than SUVA. Overall, PCA analyses indicates similar size-based  
262 mixtures of DOM among hydrologic compartments regardless of ecozone. Certain characteristics can be  
263 used to identify specific hydrologic compartments; namely, proportions of BP and LMWN differentiate

264 surface from groundwater DOM. Groundwater DOM evolves with enhanced processing time and  
265 sorption to mineral surfaces into a composition dominated by smaller components. Surface water DOM  
266 is much different than groundwater DOM and contains high proportions of processed humics and  
267 microbial-like DOM. Implementation of this size-based grouping scheme provides a quantitative tool to  
268 measure DOM composition while acknowledging the inherent heterogeneity when attempting to  
269 characterize DOM.

270

## 271 **ACKNOWLEDGEMENTS**

272 Thanks to the Environmental Geochemistry Laboratory at the University of Waterloo for assistance  
273 with sample collection and processing. Staff of the Fredericton Research and Development Centre,  
274 Agriculture and Agri-Food Canada, collected samples from the Black Brook Watershed, New  
275 Brunswick. This work benefited from the assistance of Monica Tudorancea with operation of the LC-  
276 OCD instrument. Funding was provided by a Natural Science and Engineering Research Council  
277 (NSERC) of Canada grant to S. L. Schiff, and an Ontario Graduate Scholarship, University of Waterloo  
278 Scholarship, and International Association of GeoChemistry Research Award (IAGC) to P. J. K. Aukes.  
279 Additional financial support was provided to J. Spoelstra by Environment and Climate Change Canada  
280 and the Ontario Ministry of Agriculture, Food, and Rural Affairs (OMAFRA). The authors declare no  
281 conflicts of interest related to the study.

282

## 283 **REFERENCES**

284 Aukes, P. J. K., S. L. Schiff, J. J. Venkiteswaran, R. J. Elgood, and J. Spoelstra. 2020. Data used in  
285 Hydrologic Compartments are More Important than Ecozone in Size-Based Characterization of  
286 Freshwater Dissolved Organic Matter across Canada. Univ. Waterloo Dataverse.  
287 Awad, J., J. van Leeuwen, C. W. K. Chow, M. Drikas, R. J. Smernik, D. J. Chittleborough, and E. Bestland.  
288 2016. Characterization of dissolved organic matter for prediction of trihalomethane formation  
289 potential in surface and sub-surface waters. *J. Hazard. Mater.* **308**: 430–439.

- 290 doi:10.1016/j.jhazmat.2016.01.030
- 291 Biddanda, B. A., and J. B. Cotner. 2002. Love handles in aquatic ecosystems: The role of dissolved  
292 organic carbon drawdown, resuspended sediments, and terrigenous inputs in the carbon balance  
293 of Lake Michigan. *Ecosystems* **5**: 431–445. doi:10.1007/s10021-002-0163-z
- 294 Catalán, N., J. P. Casas-Ruiz, D. von Schiller, L. Proia, B. Obrador, E. Zwirnmann, and R. Marce. 2017.  
295 Biodegradation kinetics of dissolved organic matter chromatographic fractions in an intermittent  
296 river. *J. Geophys. Res. Biogeosciences* **131**–144. doi:10.1002/2016JG003512
- 297 Chin, Y., S. J. Traina, C. R. Swank, and D. Backhus. 1998. Abundance and properties of dissolved organic  
298 matter in pore waters of a freshwater wetland. *Limnol. Oceanogr.* **43**: 1287–1296.
- 299 Ciputra, S., A. Antony, R. Phillips, D. Richardson, and G. Leslie. 2010. Comparison of treatment options  
300 for removal of recalcitrant dissolved organic matter from paper mill effluent. *Chemosphere* **81**:  
301 86–91. doi:10.1016/j.chemosphere.2010.06.060
- 302 Creed, I. F., A. K. Bergström, C. G. Trick, and others. 2018. Global change-driven effects on dissolved  
303 organic matter composition: Implications for food webs of northern lakes. *Glob. Chang. Biol.* **24**:  
304 3692–3714. doi:10.1111/gcb.14129
- 305 Creed, I. F., D. M. Mcknight, B. A. Pellerin, and others. 2015. The river as a chemostat : fresh  
306 perspectives on dissolved organic matter flowing down the river continuum. *Can. J. Fish. Aquat.*  
307 *Sci.* **14**: 1–14.
- 308 Curtis, P. J., and D. W. Schindler. 1997. Hydrologic control of dissolved organic matter in low-order  
309 Precambrian Shield lakes. *Biogeochemistry* **36**: 125–138. doi:10.1023/A:1005787913638
- 310 Harfmann, J. L., F. Guillemette, K. Kaiser, R. G. M. Spencer, C.-Y. Y. Chuang, and P. J. Hernes. 2019.  
311 Convergence of Terrestrial Dissolved Organic Matter Composition and the Role of Microbial  
312 Buffering in Aquatic Ecosystems. *J. Geophys. Res. Biogeosciences*. doi:10.1029/2018JG004997
- 313 He, W., I. Choi, J.-J. Lee, and J. Hur. 2016. Coupling effects of abiotic and biotic factors on molecular  
314 composition of dissolved organic matter in a freshwater wetland. *Sci. Total Environ.* **544**: 525–534.  
315 doi:10.1016/j.scitotenv.2015.12.008

- 316 Heinz, M., D. Graeber, D. Zak, E. Zwirnmann, J. Gelbrecht, and M. T. Pusch. 2015. Comparison of  
317 Organic Matter Composition in Agricultural versus Forest Affected Headwaters with Special  
318 Emphasis on Organic Nitrogen. *Environ. Sci. Technol.* **49**: 2081–2090. doi:10.1021/es505146h
- 319 Her, N., G. L. Amy, and D. Foss. 2002. Variations of molecular weight estimation by HP-size exclusion  
320 chromatography with UVA versus online DOC detection. *Environ. Sci. Technol.* **36**: 3393–3399.
- 321 Huber, S. A., A. Balz, M. Abert, and W. Pronk. 2011. Characterisation of aquatic humic and non-humic  
322 matter with size-exclusion chromatography – organic carbon detection – organic nitrogen  
323 detection (LC-OCD-OND). *Water Res.* **45**: 879–885. doi:10.1016/j.watres.2010.09.023
- 324 Hunt, A. P., J. D. Parry, and J. Hamilton-Taylor. 2000. Further evidence of elemental composition as an  
325 indicator of the bioavailability of humic substances to bacteria. *Limnol. Oceanogr.* **45**: 237–241.
- 326 Hutchins, R. H. S., P. J. K. Aukes, S. L. Schiff, T. Dittmar, Y. T. Prairie, and P. A. del Giorgio. 2017. The  
327 Optical, Chemical, and Molecular Dissolved Organic Matter Succession Along a Boreal Soil-  
328 Stream-River Continuum. *J. Geophys. Res. Biogeosciences* **122**: 2892–2908.  
329 doi:10.1002/2017JG004094
- 330 Jaffé, R., D. McKnight, N. Maie, R. M. Cory, W. H. McDowell, and J. L. Campbell. 2008. Spatial and  
331 temporal variations in DOM composition in ecosystems: The importance of long-term monitoring  
332 of optical properties. *J. Geophys. Res.* **113**: 1–15. doi:10.1029/2008JG000683
- 333 Jaffé, R., Y. Yamashita, N. Maie, and others. 2012. Dissolved Organic Matter in Headwater Streams:  
334 Compositional Variability across Climatic Regions of North America. *Geochim. Cosmochim. Acta*  
335 **94**: 95–108. doi:10.1016/j.gca.2012.06.031
- 336 Kellerman, A. M., T. Dittmar, D. N. Kothawala, and L. J. Tranvik. 2014. Chemodiversity of dissolved  
337 organic matter in lakes driven by climate and hydrology. *Nat. Commun.* **5**: 1–8.  
338 doi:10.1038/ncomms4804
- 339 Kellerman, A. M., D. N. Kothawala, T. Dittmar, and L. J. Tranvik. 2015. Persistence of dissolved organic  
340 matter in lakes related to its molecular characteristics. *Nat. Geosci.* **8**. doi:10.1038/ngeo2440
- 341 Kent, F. C., K. R. Montreuil, A. K. Stoddart, V. A. Reed, and G. A. Gagnon. 2014. Combined use of resin

342 fractionation and high performance size exclusion chromatography for characterization of natural  
343 organic matter. *J. Environ. Sci. Heal.* **4529**: 1615–1622. doi:10.1080/10934529.2014.950926

344 Krasner, S. W., H. S. Weinberg, S. D. Richardson, S. J. Pastor, R. Chinn, M. J. Scimmenti, G. D. Onstad,  
345 and A. D. Thruston. 2006. Occurrence of a New Generation of Disinfection Byproducts. *Environ.*  
346 *Sci. Technol.* **40**: 7175–7185. doi:10.1021/es060353j

347 Marshall, I. B., P. H. Schut, and M. Ballard. 1999. A National Ecological Framework for Canada:  
348 Attribute Data. Ecosystem Stratification Working Group, Agriculture and Agri-Food Canada &  
349 Environment Canada.

350 McCallister, S. L., N. F. Ishikawa, and D. N. Kothawala. 2018. Biogeochemical tools for characterizing  
351 organic carbon in inland aquatic ecosystems. *Limnol. Oceanogr. Lett.* **3**: 444–457.  
352 doi:10.1002/lol2.10097

353 Mueller, K. K., C. Fortin, and P. G. C. Campbell. 2012. Spatial Variation in the Optical Properties of  
354 Dissolved Organic Matter (DOM) in Lakes on the Canadian Precambrian Shield and Links to  
355 Watershed Characteristics. *Aquat. Geochemistry* **18**: 21–44. doi:10.1007/s10498-011-9147-y

356 Ogawa, H., Y. Amagai, I. Koike, K. Kaiser, and R. Benner. 2001. Production of Refractory Dissolved  
357 Organic Matter by Bacteria. *Science (80-. )*. **292**: 917–920. doi:10.1126/science.1057627

358 R Core Team. 2019. R: A language and environment for statistical computing.

359 Ritson, J. P., N. J. D. Graham, M. R. Templeton, J. M. Clark, R. Gough, and C. Freeman. 2014. The impact  
360 of climate change on the treatability of dissolved organic matter (DOM) in upland water supplies:  
361 A UK perspective. *Sci. Total Environ.* **473–474**: 714–730. doi:10.1016/j.scitotenv.2013.12.095

362 Schindler, D. W., P. J. Curtis, B. R. Parker, and M. P. Stainton. 1996. Consequences of climate warming  
363 and lake acidification for UV-B penetration in North American boreal lakes. *Nature* **379**: 705–708.

364 Shen, Y., F. H. Chapelle, E. W. Strom, and R. Benner. 2015. Origins and bioavailability of dissolved  
365 organic matter in groundwater. *Biogeochemistry* **122**: 61–78. doi:10.1007/s10533-014-0029-4

366 Spence, C., S. V. Kokelj, and E. Ehsanzadeh. 2011. Precipitation trends contribute to streamflow regime  
367 shifts in northern Canada. *Cold Region Hydrology in a Changing Climate*. 3–8.

- 368 Szabo, H. M., and T. Tuhkanen. 2010. The application of HPLC-SEC for the simultaneous  
369 characterization of NOM and nitrate in well waters. *Chemosphere* **80**: 779–86.  
370 doi:10.1016/j.chemosphere.2010.05.007
- 371 Tercero Espinoza, L. A., E. ter Haseborg, M. Weber, and F. H. Frimmel. 2009. Investigation of the  
372 photocatalytic degradation of brown water natural organic matter by size exclusion  
373 chromatography. *Appl. Catal. B Environ.* **87**: 56–62. doi:10.1016/j.apcatb.2008.08.013
- 374 Wauthy, M., M. Rautio, K. S. Christoffersen, L. Forsström, I. Laurion, H. L. Mariash, S. Peura, and W. F.  
375 Vincent. 2018. Increasing dominance of terrigenous organic matter in circumpolar freshwaters due  
376 to permafrost thaw. *Limnol. Oceanogr. Lett.* doi:10.1002/lol2.10063
- 377 Weishaar, J. L., G. R. Aiken, B. A. Bergamaschi, M. S. Fram, R. Fujii, and K. Mopper. 2003. Evaluation of  
378 specific ultraviolet absorbance as an indicator of the chemical composition and reactivity of  
379 dissolved organic carbon. *Environ. Sci. Technol.* **37**: 4702–4708. doi:10.1021/es030360x
- 380

381 **TABLES**

382 *Table 1: Dissolved organic matter concentration, specific UV-absorbance at 254 nm (SUVA), and LC-OCD characterization for different sites and hydrological compartments across a*  
 383 *range of Canadian ecozones. The LC-OCD percentages are relative to the total hydrophilic fraction of the samples and include biopolymers (BP), humic substances (HS), building*  
 384 *blocks (BB), low molecular weight neutrals (LMW-N), and LMWN acids (LMWA).*

| Ecozone             | Location                            | Hydrological<br>Compartment<br>Type | n  | DOM<br>(mg C/L) |                    | SUVA<br>(L / (mg m)) |                    | BP<br>(%) |                    | HS<br>(%) |                    | BB<br>(%) |                    | LMWN<br>(%) |                    | LMWA<br>(%) |                    |
|---------------------|-------------------------------------|-------------------------------------|----|-----------------|--------------------|----------------------|--------------------|-----------|--------------------|-----------|--------------------|-----------|--------------------|-------------|--------------------|-------------|--------------------|
|                     |                                     |                                     |    | Mean            | $\sigma$ ( $\pm$ ) | Mean                 | $\sigma$ ( $\pm$ ) | Mean      | $\sigma$ ( $\pm$ ) | Mean      | $\sigma$ ( $\pm$ ) | Mean      | $\sigma$ ( $\pm$ ) | Mean        | $\sigma$ ( $\pm$ ) | Mean        | $\sigma$ ( $\pm$ ) |
| Southern<br>Arctic  | Daring Lake                         | Subsurface                          | 4  | 21.0            | 9.35               | 5.3                  | 0.5                | 5.39      | 3.95               | 73.1      | 4.52               | 14.8      | 2.75               | 6.39        | 2.37               | 0.30        | 0.35               |
|                     |                                     | Pond                                | 1  | 4.00            |                    | 2.2                  |                    | 33.5      |                    | 39.8      |                    | 15.3      |                    | 11.3        |                    | 0.00        |                    |
|                     |                                     | Lake                                | 8  | 5.64            | 2.95               | 3.4                  | 1.2                | 14.6      | 14.4               | 58.5      | 15.8               | 15.6      | 3.41               | 10.8        | 1.93               | 0.54        | 0.42               |
| Taiga Shield        | Wekweètì                            | Stream                              | 10 | 7.96            | 3.44               | 3.8                  | 0.8                | 13.3      | 9.50               | 57.4      | 10.4               | 17.4      | 3.30               | 11.0        | 1.15               | 0.95        | 0.48               |
|                     |                                     | Subsurface                          | 1  | 10.2            |                    | 4.7                  |                    | 2.09      |                    | 70.1      |                    | 14.8      |                    | 6.91        |                    | 6.18        |                    |
|                     |                                     | Lake                                | 6  | 11.0            | 5.05               | 3.4                  | 1.1                | 7.24      | 4.07               | 59.9      | 10.3               | 20.7      | 4.75               | 10.3        | 2.90               | 1.91        | 2.36               |
| Taiga Shield        | Yellowknife                         | Stream                              | 1  | 6.24            |                    | 2.6                  |                    | 12.3      |                    | 57.2      |                    | 19.6      |                    | 9.94        |                    | 0.91        |                    |
|                     |                                     | Subsurface                          | 17 | 94.1            | 41.4               | 4.4                  | 0.8                | 5.79      | 3.90               | 75.8      | 5.93               | 10.3      | 2.91               | 7.15        | 1.61               | 1.02        | 1.75               |
|                     |                                     | Pond                                | 2  | 31.9            | 2.97               | 3.6                  | 0.4                | 5.08      | 1.89               | 70.5      | 1.70               | 14.8      | 0.53               | 8.56        | 0.65               | 1.04        | 0.31               |
|                     |                                     | Lake                                | 1  | 27.8            |                    | 1.5                  |                    | 21.9      |                    | 52.0      |                    | 15.8      |                    | 9.84        |                    | 0.60        |                    |
| Boreal<br>Shield    | IISD-<br>Experimental<br>Lakes Area | Stream                              | 1  | 16.0            |                    | 2.0                  |                    | 19.5      |                    | 55.4      |                    | 15.8      |                    | 8.67        |                    | 0.64        |                    |
|                     |                                     | River                               | 3  | 6.49            | 1.25               | 2.0                  | 0.2                | 10.7      | 3.10               | 59.8      | 2.36               | 17.0      | 1.27               | 10.7        | 0.56               | 1.76        | 2.08               |
|                     |                                     | Wetland                             | 17 | 47.8            | 22.3               | 2.9                  | 0.9                | 7.21      | 2.76               | 37.2      | 13.6               | 7.82      | 2.65               | 46.9        | 15.0               | 0.81        | 1.60               |
|                     |                                     | Subsurface                          | 21 | 7.53            | 2.80               | 3.2                  | 1.7                | 14.8      | 6.21               | 49.2      | 6.95               | 23.0      | 3.74               | 12.2        | 1.82               | 0.79        | 0.57               |
|                     |                                     | Wetland Complex                     | 2  | 12.2            | 3.00               | 4.3                  | 0.2                | 11.8      | 0.71               | 58.7      | 4.41               | 18.1      | 2.85               | 10.7        | 0.54               | 0.83        | 0.30               |
| Mixedwood<br>Plains | Nottawasaga<br>Valley               | Stream                              | 11 | 20.4            | 6.77               | 5.3                  | 0.6                | 2.50      | 2.66               | 80.7      | 2.85               | 9.40      | 3.60               | 7.27        | 1.62               | 0.17        | 0.27               |
|                     |                                     | Wetland                             | 9  | 1.83            | 0.69               | 3.2                  | 1.4                | 3.20      | 4.22               | 43.5      | 17.7               | 21.5      | 5.05               | 28.0        | 18.8               | 6.49        | 15.8               |
| Mixedwood<br>Plains | Grand River                         | Subsurface                          | 7  | 4.20            | 5.56               | 3.4                  | 1.0                | 0.51      | 0.40               | 58.3      | 12.2               | 23.5      | 7.20               | 17.3        | 11.5               | 0.68        | 1.13               |
|                     |                                     | Subsurface                          | 6  | 2.07            | 0.53               | 3.6                  | 0.1                | 0.42      | 0.26               | 54.9      | 8.02               | 28.8      | 5.30               | 15.9        | 3.24               | 0.03        | 0.08               |
|                     |                                     | River                               | 7  | 6.07            | 0.73               | 2.6                  | 0.6                | 9.54      | 0.77               | 65.9      | 1.78               | 14.6      | 0.93               | 9.60        | 0.79               | 0.28        | 0.45               |



|                      |             |            |    |      |      |     |     |      |      |      |      |      |      |      |      |      |      |
|----------------------|-------------|------------|----|------|------|-----|-----|------|------|------|------|------|------|------|------|------|------|
| Atlantic<br>Maritime | Black Brook | Subsurface | 15 | 0.67 | 0.47 | 2.3 | 0.9 | 1.32 | 1.39 | 53.6 | 10.2 | 27.3 | 7.87 | 17.7 | 6.66 | 0.12 | 0.47 |
|----------------------|-------------|------------|----|------|------|-----|-----|------|------|------|------|------|------|------|------|------|------|

---

386 FIGURES

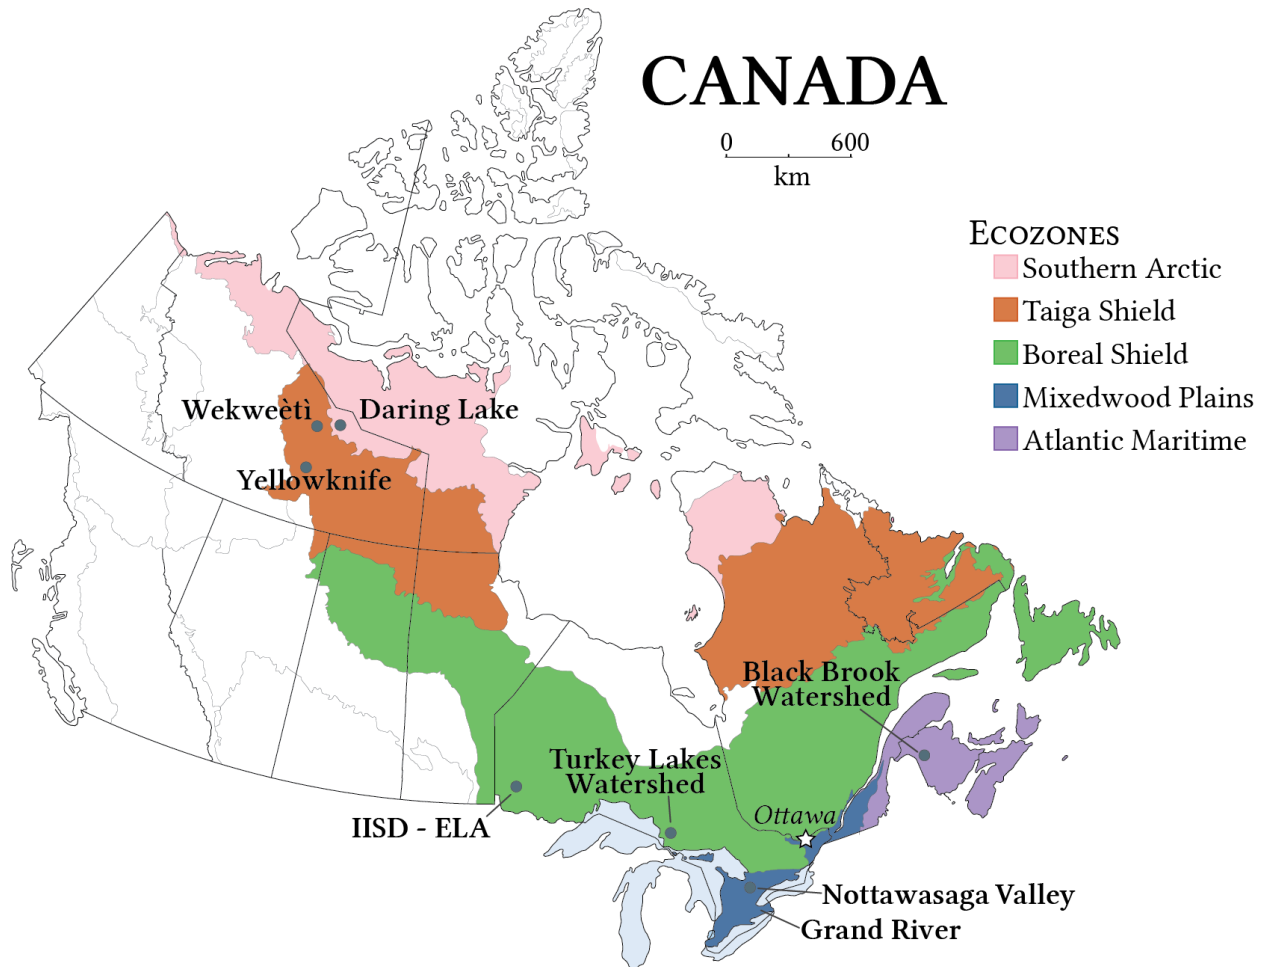

387  
388 *Figure 1:* Ecozones (Marshall et al. 1999) and DOM collection sites: Daring Lake (DL; Southern Arctic ecozone),  
389 Wekweëti (WK; Taiga Shield ecozone), Yellowknife (YW; Taiga Shield ecozone), International Institute for  
390 Sustainable Development - Experimental Lakes Area (IISD-ELA; Boreal Shield ecozone), Turkey Lakes Watershed  
391 (TLW; Boreal Shield ecozone), Nottawasaga Valley (NW; Mixedwood Plains ecozone), Grand River Watershed  
392 (GR; Mixedwood Plains ecozone), and Black Brook Watershed (BBK; Atlantic Maritime ecozone).

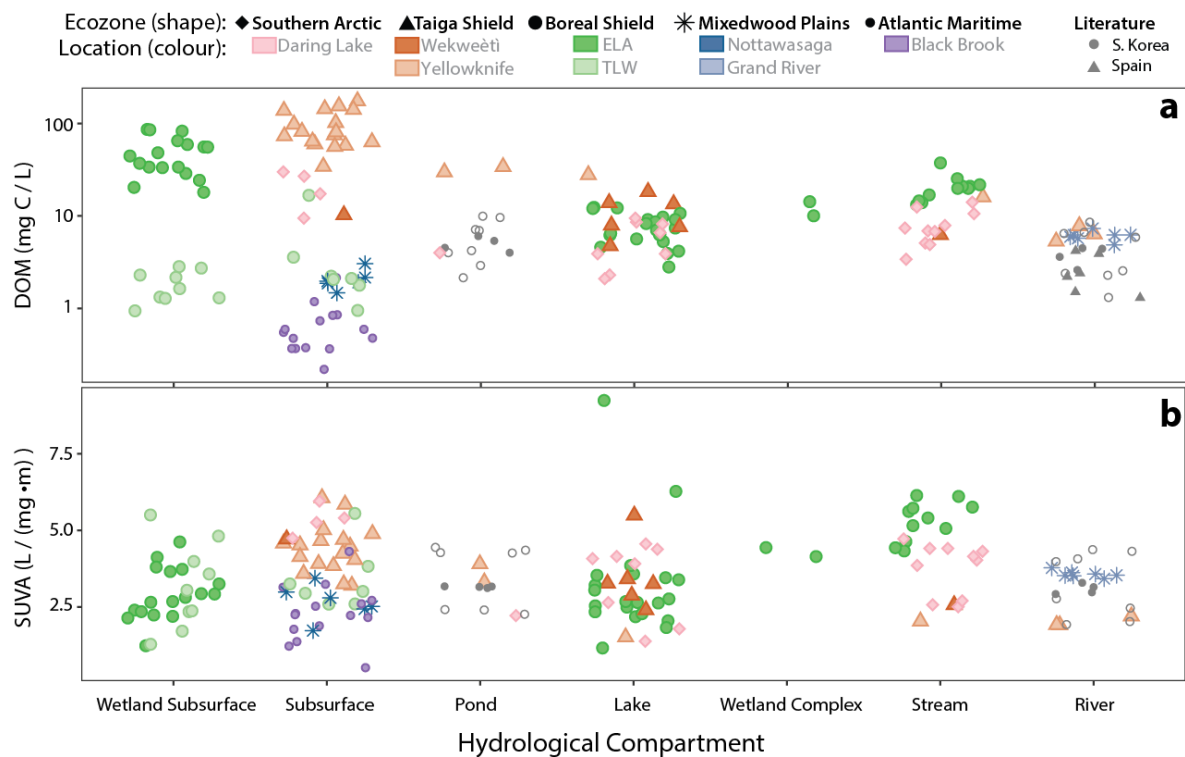

393  
 394 *Figure 2:* Comparison of dissolved organic matter concentration (DOM; logarithmic y-scale, a) and specific ultra-violet  
 395 absorbance at 254 nm (SUVA; b) across different hydrological compartments. Different ecozones are denoted by different  
 396 shapes, and separate locations within each ecozone are differentiated by colour. Included are literature values that use LC-OCD  
 397 in South Korea (He et al. 2016) and Spain (Catalán et al. 2017), and are denoted by symbols in grey. Literature values from  
 398 South Korea include a maximum and minimum value found within the study (open circle). Random scatter is introduced in the  
 399 x-axis for ease of seeing all data points.

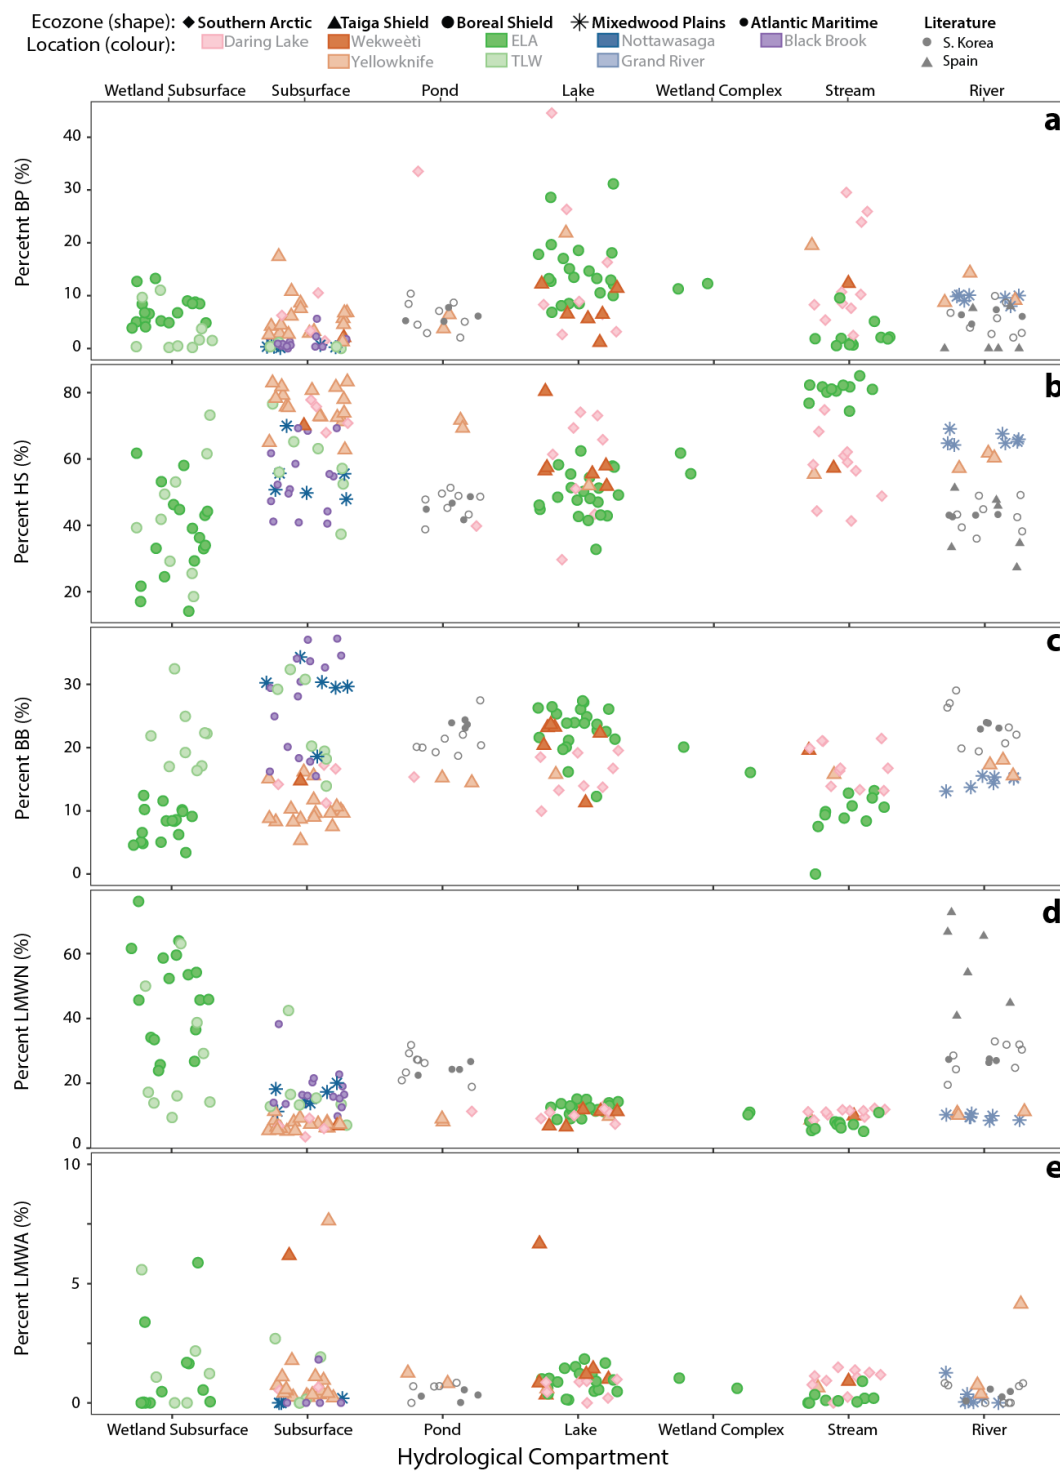

400  
 401 *Figure 3: Differences in the composition of DOM based on proportions of LC-OCD groups across hydrological compartments:*  
 402 *biopolymers (BP; a), humic substances (HS; b), building blocks (BB; c), low molecular weight neutrals (LMWN; d), and low*  
 403 *molecular weight acids (LMWA; e). Different ecozones are denoted by different shapes, and separate locations within each*  
 404 *ecozone are differentiated by colour. Included are literature values that use LC-OCD in South Korea (He et al. 2016) and Spain*

405 (Catalán et al. 2017), and are denoted by symbols in grey. South Korea include a maximum and minimum value found within  
406 the study (open circle). Random scatter is introduced in the x-axis for ease of seeing all data points.

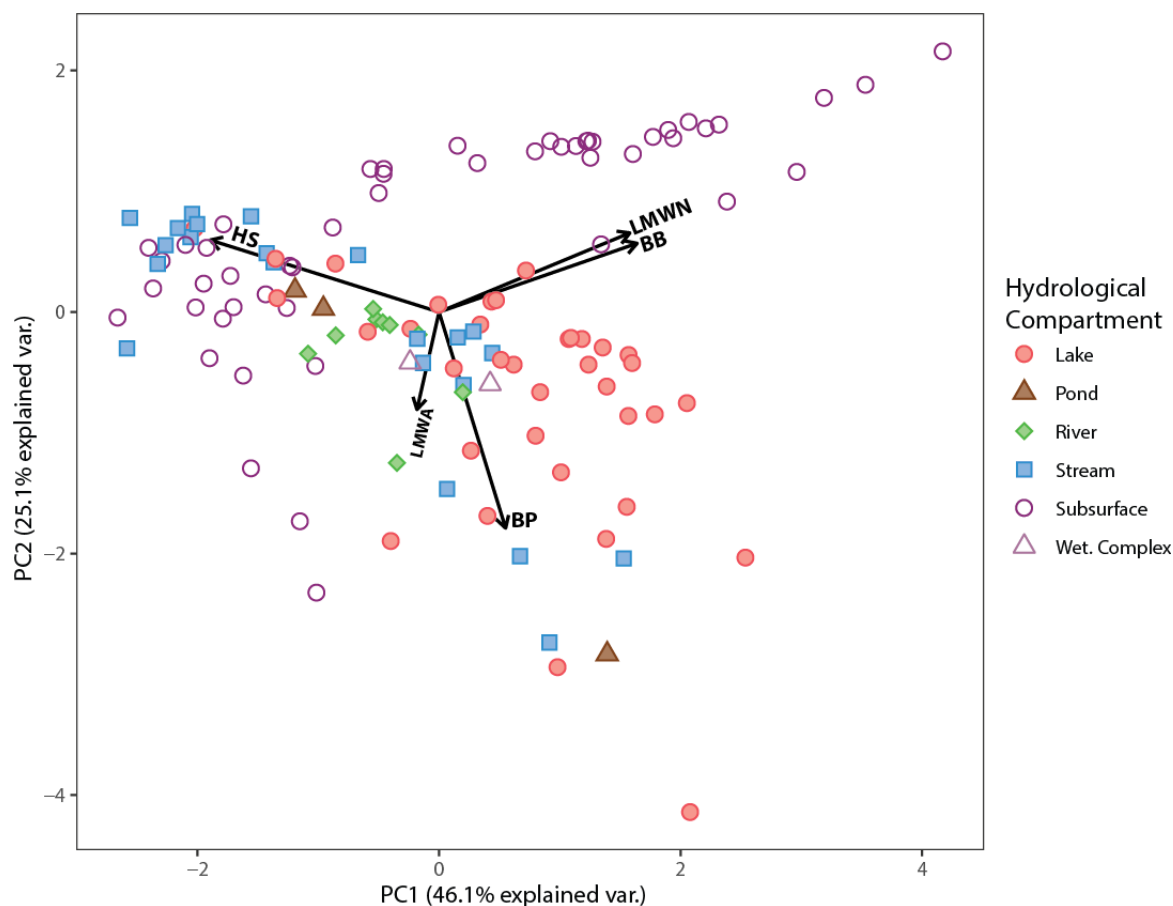

407  
408 *Figure 4:* Principal component analyses (PCA) of LC-OCD data (minus wetland groundwater samples) with first and second  
409 principal component axes plotted. PCA vectors are included for the proportion of DOM for each LC-OCD group: biopolymers  
410 (BP), humic substances fraction (HS), building blocks (BB), low molecular weight neutrals (LMWN), and low molecular weight  
411 acids (LMWA).
